# Supplementary material for: Uncovering protein–protein interactions through a team-based undergraduate biochemistry course
Source: PLoS Biol. 2017 Nov 1;15(11):e2003145. doi: 10.1371/journal.pbio.2003145 (PMC5683658; doi:10.1371/journal.pbio.2003145)
Supplement: S1 Table — (XLSX) [file pbio.2003145.s012.xlsx]

## Sheet: Sheet1
Proteins/Complexes	s20,w	D20,w	f/f0	Theoretical MW (Da)	Experimental MW (Da)	kD / μM
P450sky WT	3.78±0.002	6.43±0.03	1.3	49311	53,000±2,400	-
P450sky Trp193Ala	3.77±0.002	6.39±0.03	1.3	49196	53,300±2,700	-
P450sky Leu194Ala	3.76±0.004	6.56±0.06	1.3	49269	51,790±4,500	-
Trp193Ala/Leu194Ala	3.77±0.002	6.43±0.03	1.3	49153	52,880±2,600	-
WT-ImidazolePCP7	4.59±0.003	5.19±0.04	1.37	73218	77,730±540	12.4±2.2
Trp193Ala-ImidazolePCP7	4.13±0.003	5.80±0.05	1.39	73104	64,250±530	82.2±10.5
Leu194Ala-ImidazolePCP7	4.29±0.003	5.38±0.04	1.35	73177	72,290±490	31.6±5.5
Double Mutant-ImidazolePCP7	3.85±0.002	6.34±0.04	1.29	73061	54,880±380	252.5±20.5
WT-L(OMe)TyrPCP7	4.00±0.003	6.14±0.05	1.36	73301	59,000±450	72±5
Trp193Ala-L(OMe)TyrPCP7	3.77±0.004	6.51±0.06	1.4	73301	52,220±510	>300
Leu194Ala-L(OMe)TyrPCP7	3.80±0.005	6.42±0.07	1.37	73259	53,360±590	>300
Double Mutant-(LOMe)TyrPCP7	3.71±0.010	6.27±0.15	1.4	73143	53,320±1,310	>300
